# Supplementary material
Source: PubMed Central journal article supplement (PMC5837193)
Supplement: ehx510_supplementary.pdf [file ehx510_supplementary.pdf]

## Addendum

**Addendum Figure 1.** The calibration of the baseline model with biomarkers.(28)

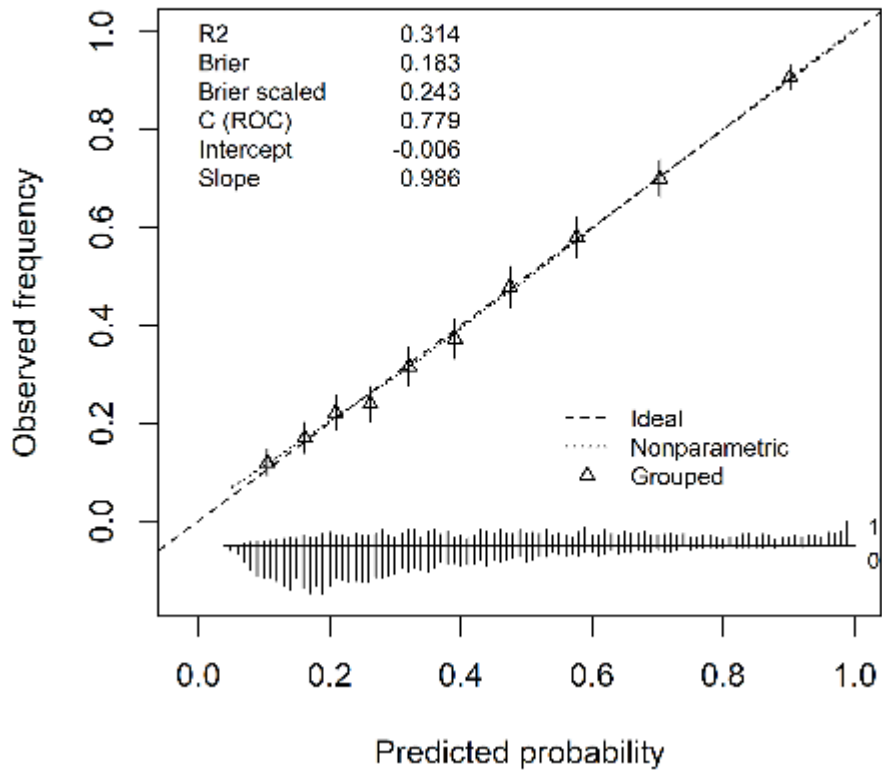

**Addendum Figure 2.** Kaplan Meier Curves for all-cause mortality related to Biomarkers and quartiles.

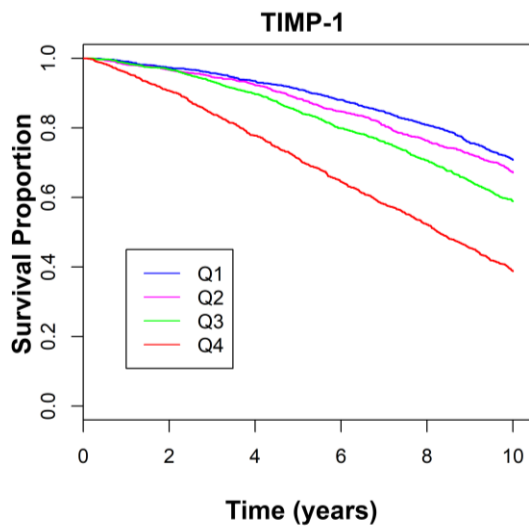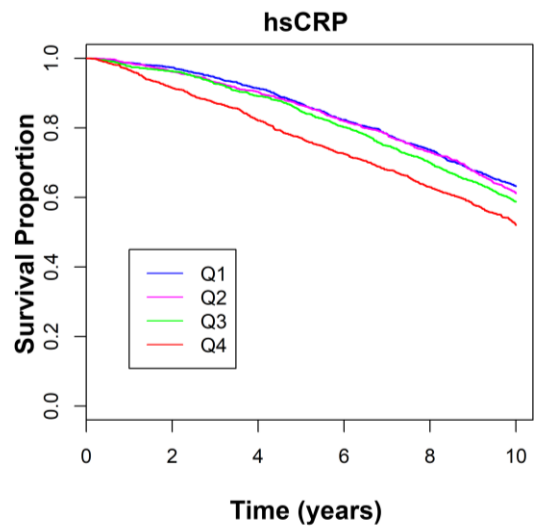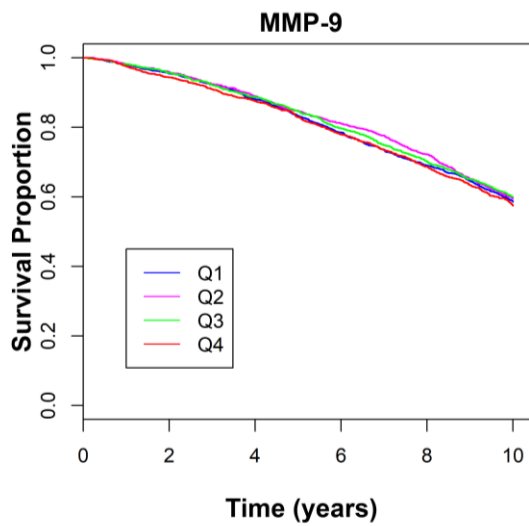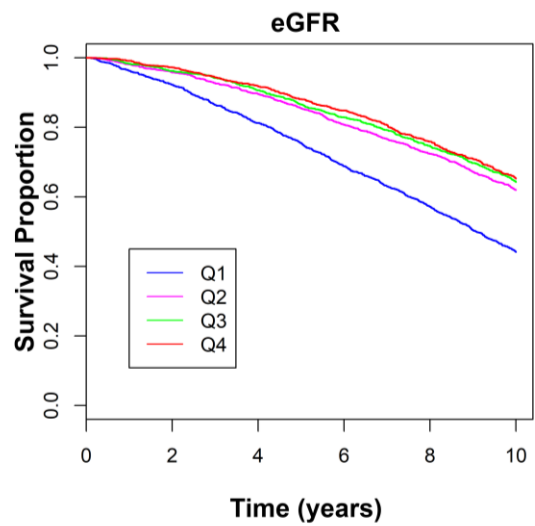

**Addendum Table 1.** Hazard ratios from Kaplan Meier survival analysis when categorized by quartiles.

| <b>Biomarker</b> | <b>Quartile 2 HRs<br/>(95% CI)</b> | <b>Quartile 3 HRs<br/>(95% CI)</b> | <b>Quartile 4 HRs<br/>(95% CI)</b> | <b>Reference</b> |
|------------------|------------------------------------|------------------------------------|------------------------------------|------------------|
| TIMP-1           | 1.00 (0.88 - 1.15)                 | 1.16 (1.02 - 1.32)                 | 1.47 (1.29 - 1.67)                 | Quartile 1       |
| hsCRP            | 0.98 (0.87 - 1.11)                 | 1.04 (0.92 - 1.17)                 | 1.25 (1.11 - 1.41)                 | Quartile 1       |
| MMP-9            | 0.96 (0.86 - 1.08)                 | 0.91 (0.81 - 1.02)                 | 1.01 (0.89 - 1.13)                 | Quartile 1       |

  

| <b>Biomarker</b> | <b>Quartile 1 HRs<br/>(95%CI)</b> | <b>Quartile 2 HRs<br/>(95% CI)</b> | <b>Quartile 3 HRs<br/>(95% CI)</b> | <b>Reference</b> |
|------------------|-----------------------------------|------------------------------------|------------------------------------|------------------|
| eGFR             | 1.11 (0.98- 1.25)                 | 0.90 (0.80 - 1.03)                 | 0.95 (0.84 - 1.08)                 | Quartile 4       |

**Addendum Table 2.** Receiver Operator Curves (ROC) and Area Under the Curve (AUC) for Baseline Model + Biomarkers

| <b>Model</b>      | <b>5-year Mortality</b> |                      | <b>10-year Mortality</b> |                      |
|-------------------|-------------------------|----------------------|--------------------------|----------------------|
|                   | <b>AUC</b>              | <b>p vs Baseline</b> | <b>AUC</b>               | <b>p vs Baseline</b> |
| Baseline          | 0.7349                  | N.A.                 | 0.7694                   | N.A.                 |
| Baseline + TIMP-1 | 0.7504                  | <0.0001              | 0.7783                   | <0.0001              |
| Baseline + MMP9   | 0.7350                  | 0.76                 | 0.7694                   | 0.99                 |
| Baseline + hsCRP  | 0.7401                  | 0.0002               | 0.7704                   | 0.345                |
| Baseline + eGFR   | 0.7387                  | 0.051                | 0.7714                   | 0.155                |

TIMP-1 is the only biomarker that increases the AUC for both 5-year and 10-year mortality prediction over the baseline model ( $p < 0.0001$ ) for both endpoints.

**Addendum Table 3.** Hazard Ratios for All-Cause and **Cause-Specific Death** with 95% CI for 10-year follow-up. Hazard ratios per 1 SD difference in each variable as assessed by Multivariable Cox regression models.

| <b>10-Year Multivariable Analysis of All Cause and Cause Specific Mortality<br/>(the model includes Four biomarkers, Troponin T&amp; I &amp; Framingham variables, BMI, and Statin use)</b> |                                           |                                              |                                             |                                          |                                            |                                            |
|---------------------------------------------------------------------------------------------------------------------------------------------------------------------------------------------|-------------------------------------------|----------------------------------------------|---------------------------------------------|------------------------------------------|--------------------------------------------|--------------------------------------------|
| Cause of death                                                                                                                                                                              | TIMP-1<br>HR (95% CI)                     | Log-hsCRP<br>HR (95% CI)                     | Log-eGFR<br>HR (95% CI)                     | MMP-9<br>HR (95% CI)                     | Log-TnT<br>HR (95% CI)                     | Log-TnI<br>(HR 95% CI)                     |
| All Cause                                                                                                                                                                                   | 1.21 (1.16 – 1.27)                        | 1.08 (1.03 – 1.12)                           | 0.98 (0.94 – 1.03)                          | 1.03 (0.99 – 1.07)                       | 1.33 (1.25- 1.41)                          | 1.09 (1.04- 1.14)                          |
| CVD                                                                                                                                                                                         | 1.23 (1.15 – 1.31)                        | 1.09 (1.02 – 1.16)                           | 0.93 (0.87 – 0.99)                          | 1.01 (0.95 – 1.08)                       | 1.34 (1.22- 1.47)                          | 1.20 (1.11- 1.28)                          |
| Cause of death                                                                                                                                                                              | TIMP-1<br>Wald Chi<br>Square<br>(p value) | Log-hsCRP<br>Wald Chi<br>Square<br>(p value) | Log-eGFR<br>Wald Chi<br>Square<br>(p value) | MMP-9<br>Wald Chi<br>Square<br>(p value) | Log-TnT<br>Wald chi<br>Square<br>(p value) | Log-TnI<br>Wald chi<br>Square<br>(p value) |
| All Cause                                                                                                                                                                                   | 74.8<br>(p<0.0001)                        | 11.0<br>(p=0.0009)                           | 0.6 (p=0.426)                               | 2.5<br>(p=0.112)                         | 88.1<br>(p<0.0001)                         | 11.6<br>(p<0.0007)                         |
| CVD                                                                                                                                                                                         | 36.9<br>(p<0.0001)                        | 5.8<br>(p=0.016)                             | 4.7<br>(p=0.031)                            | 0.1<br>(p=0.75)                          | 37.7<br>(p<0.0001)                         | 23.8<br>(p<0.0001)                         |
